# Supplementary material for: Hypoxic regulation of hypoxia inducible factor 1 alpha via antisense transcription
Source: PubMed Central journal article supplement (PMC10630634; doi:10.1016/j.jbc.2023.105291), 2023-09-23
Supplement: mmc1.pdf [file mmc1.pdf]

## Supplementary Information

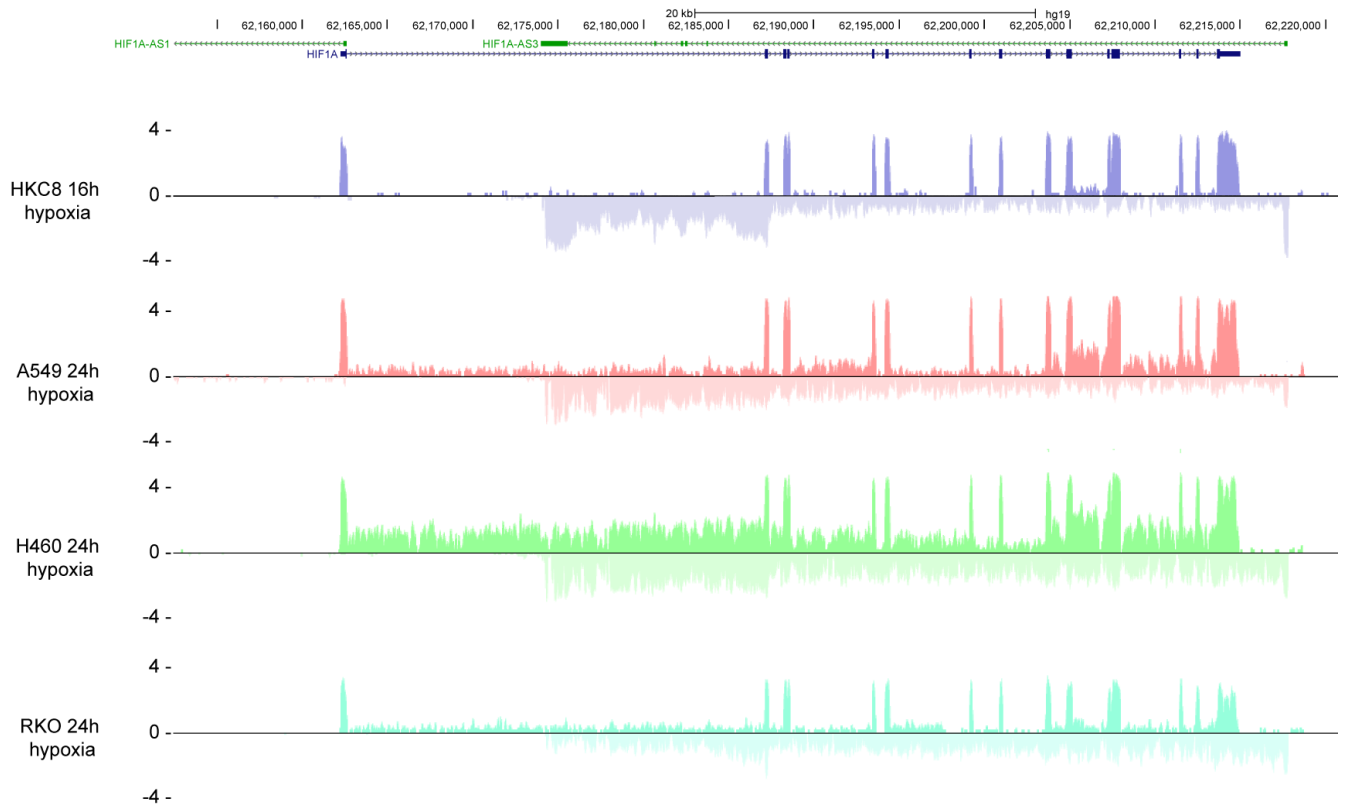

**Figure S1:** Genome browser tracks showing RNAseq alignments from hypoxic HKC8, A549, H460 and RKO cells (from GSE145568 and GSE120886). Y-axis is log transformed ( $\ln(1+x)$ ).

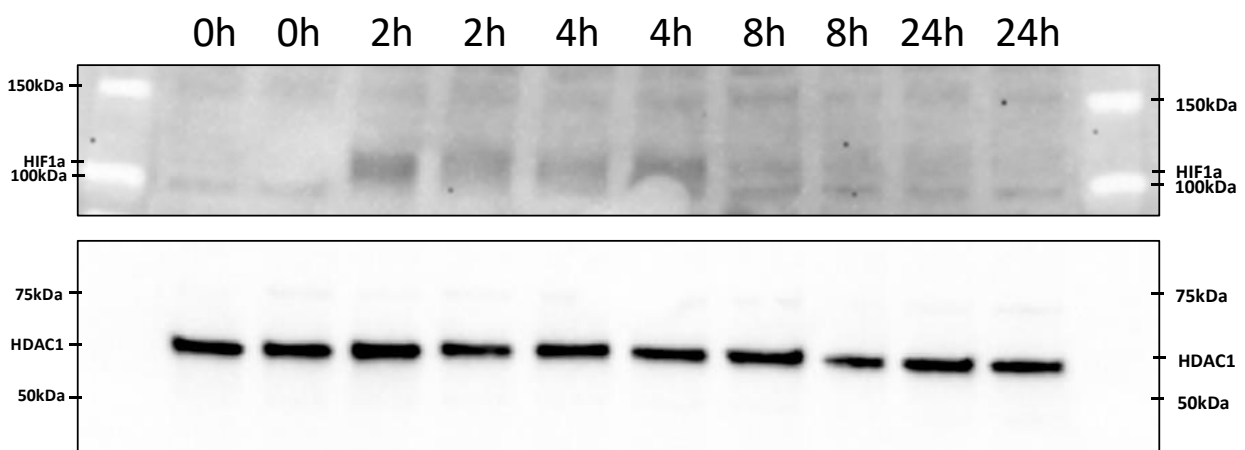

**Figure S2:** Western blot for HIF1A protein isolated from HUVEC nuclear extracts at multiple hypoxia time points. HDAC1 used as a loading control.

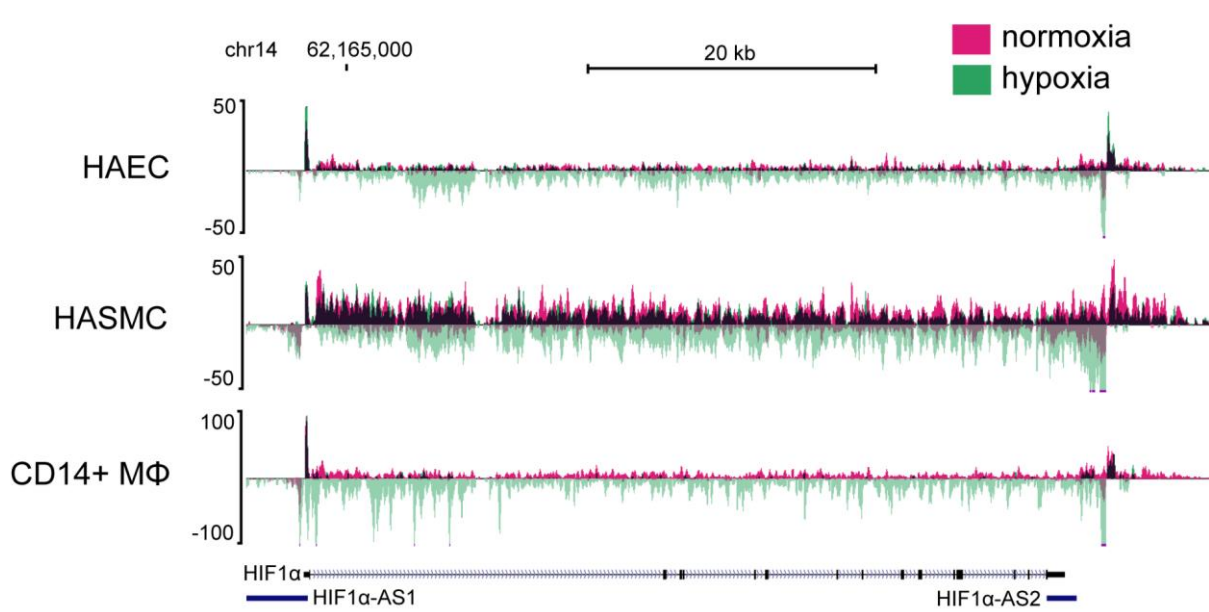

**Figure S3:** UCSC browser image of the *HIF1A* locus in normoxia and hypoxia in HAECs, HASMCs and CD14+ macrophages (MΦ). Normalized reads for GRO-Seq samples are presented.

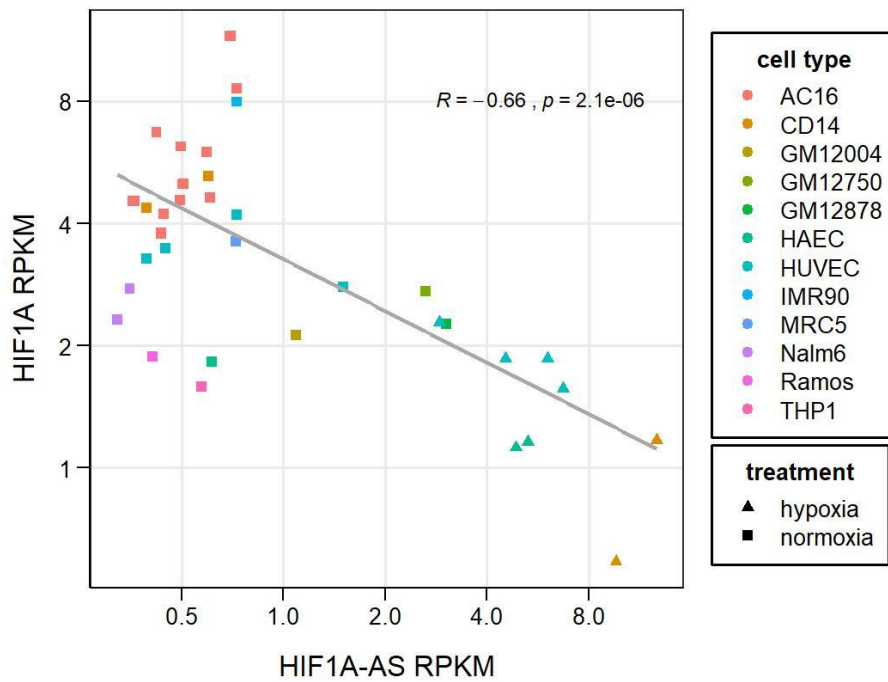

**Figure S4:** Pearson correlation of *HIF1A* and *HIF1A-AS* nascent transcript expression in 12 cell types using GRO-Seq.

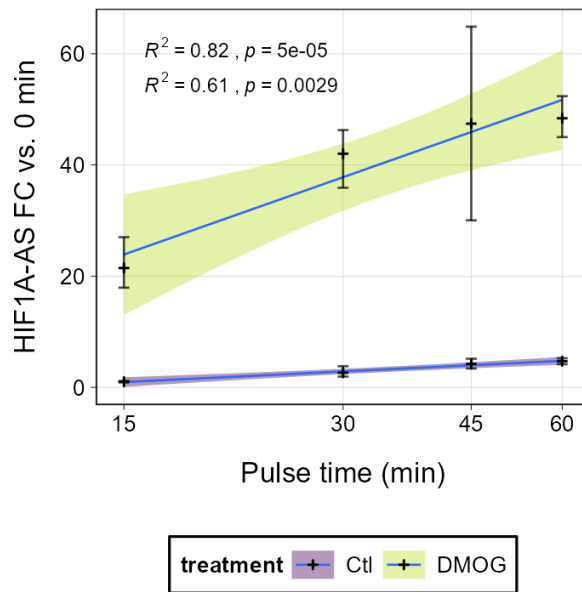

**Figure S5:** Relative expression of *HIF1A-AS* labelled with 5-Ethynyl Uridine for 15, 30, 45 or 60 minutes in untreated and dimethyloxallyl glycine (DMOG) treated HUVECs, error line represents 95% confidence intervals.

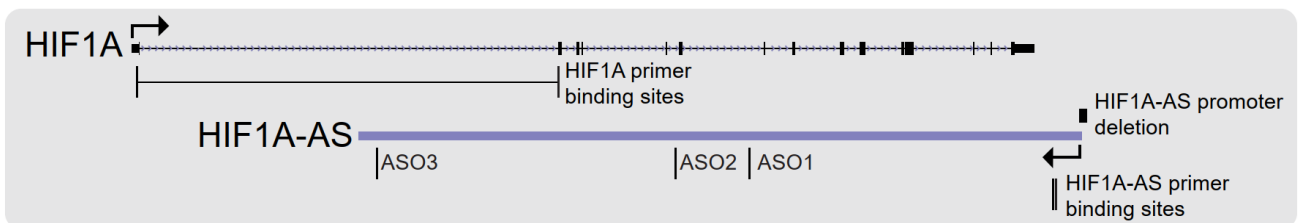

**Figure S6.** Schematic representing the annotation of *HIF1A* and *HIF1A-AS*. The locations of the 3 ASO targeting the *HIF1A-AS* transcript, site of promoter deletion and primer sites used to quantify *HIF1A-AS* and *HIF1A* expression via qPCR are shown.

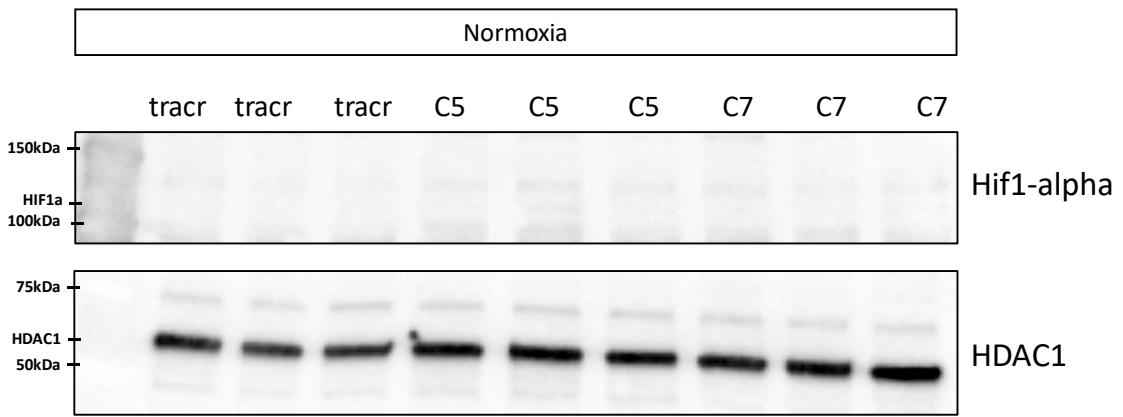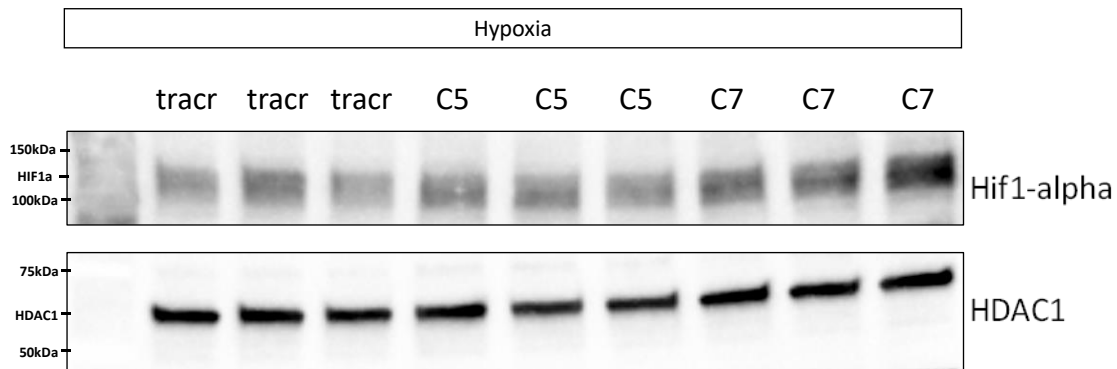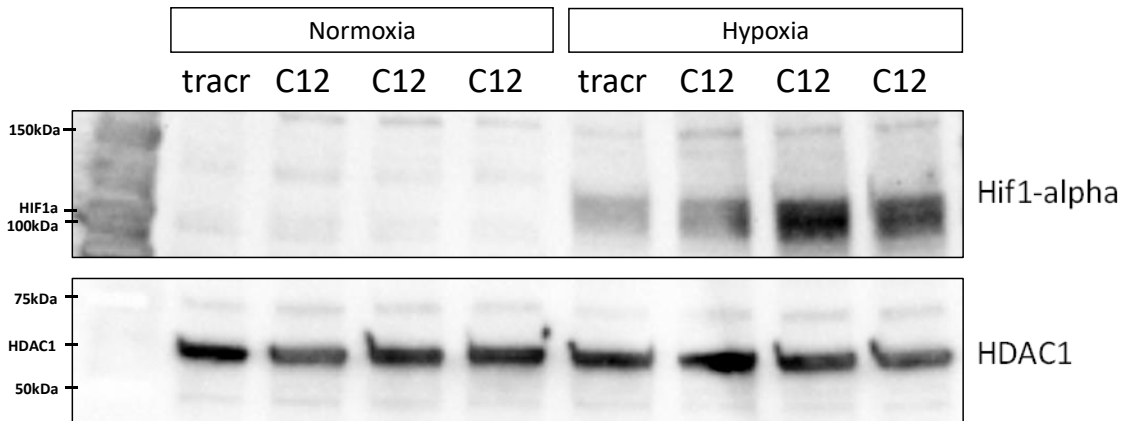

**Figure S7:** Western blot for HIF1a protein isolated from nuclear extracts of hypoxic and normoxic treated wildtype and CRISPR modified ( $\Delta$ HIF1A-AS, clones C05, C07 and C12 compared to tracer-only control cells) EAhy cells. HDAC1 used as a loading control.

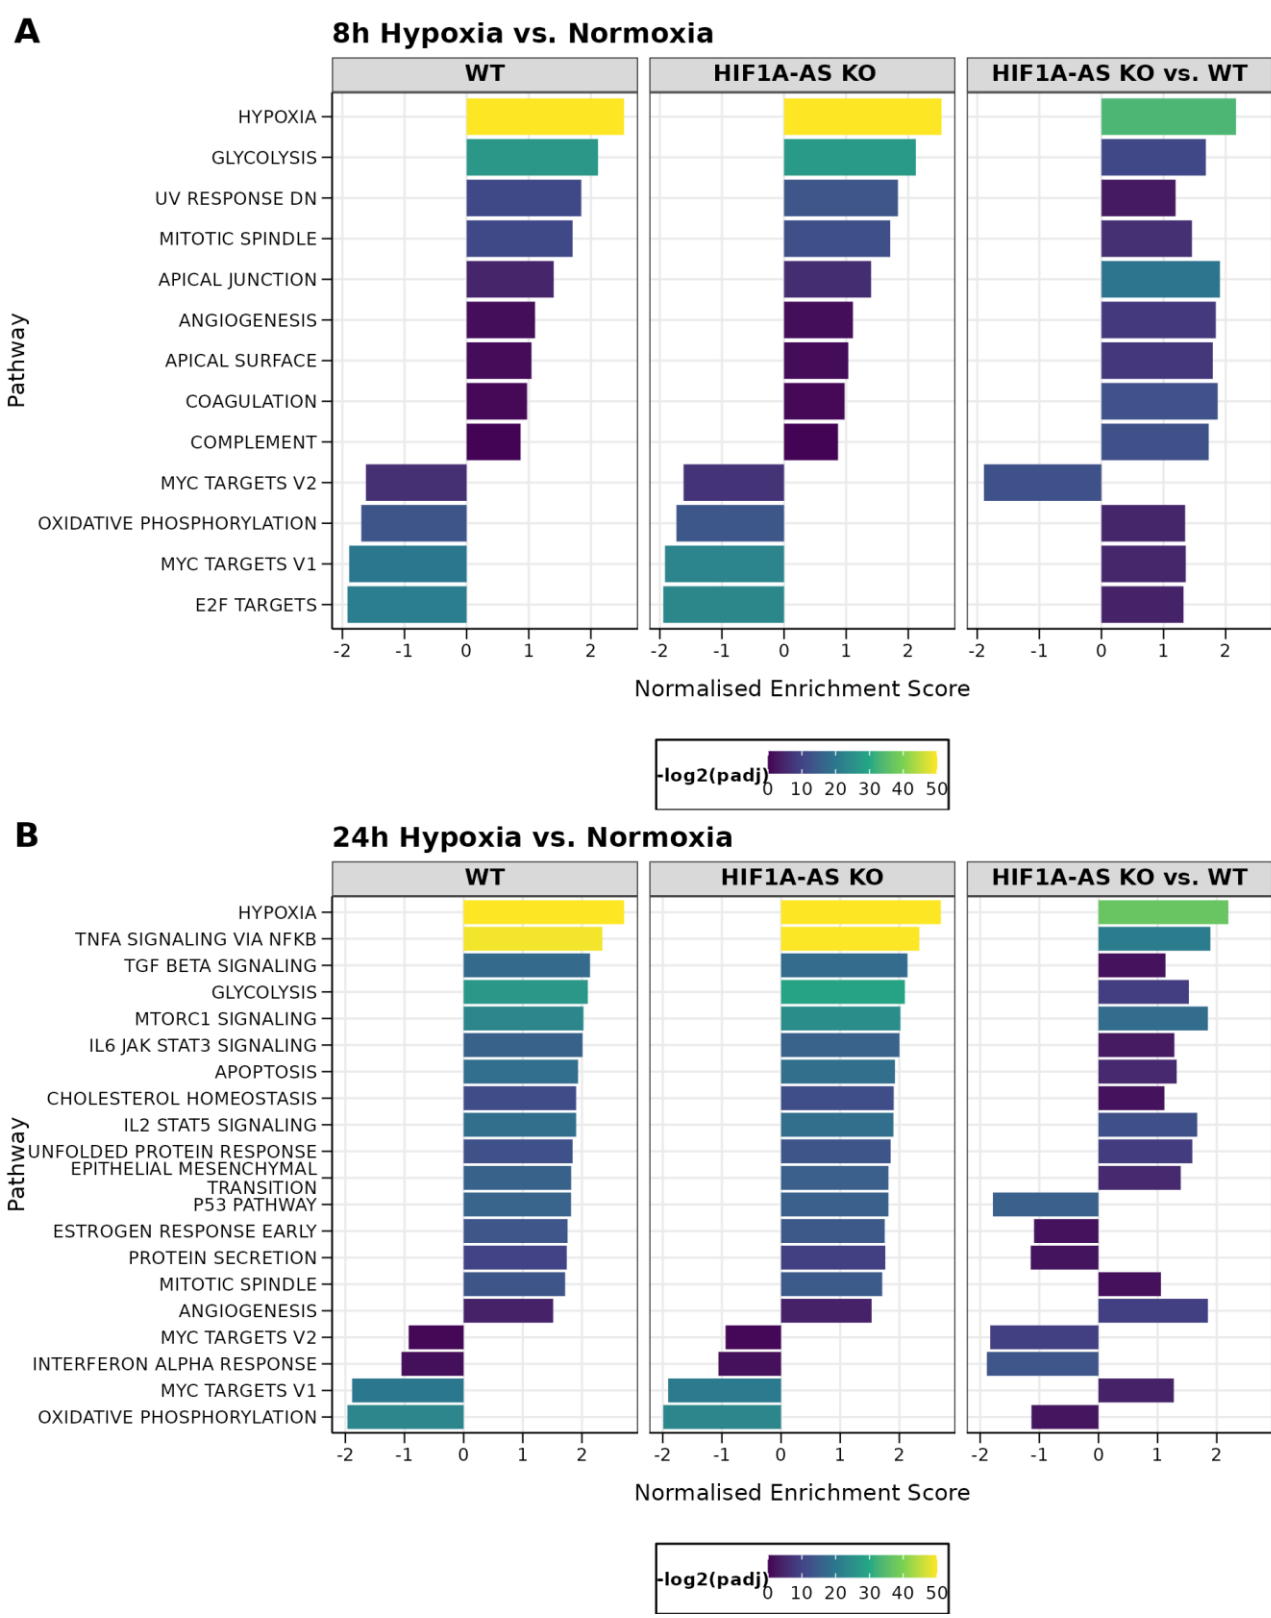

**Figure S8:** Gene set enrichment analysis (GSEA) for genes differentially expressed in **(A)** 8h of hypoxia and **(B)** 24h of hypoxia, against MSigDB hallmark gene sets. Groups shown include wildtype and HIF1A-AS knockout EA.hy cell lines, and differential expression of HIF1A-AS knockout cells relative to wildtype cells in the respective hypoxia time-point.

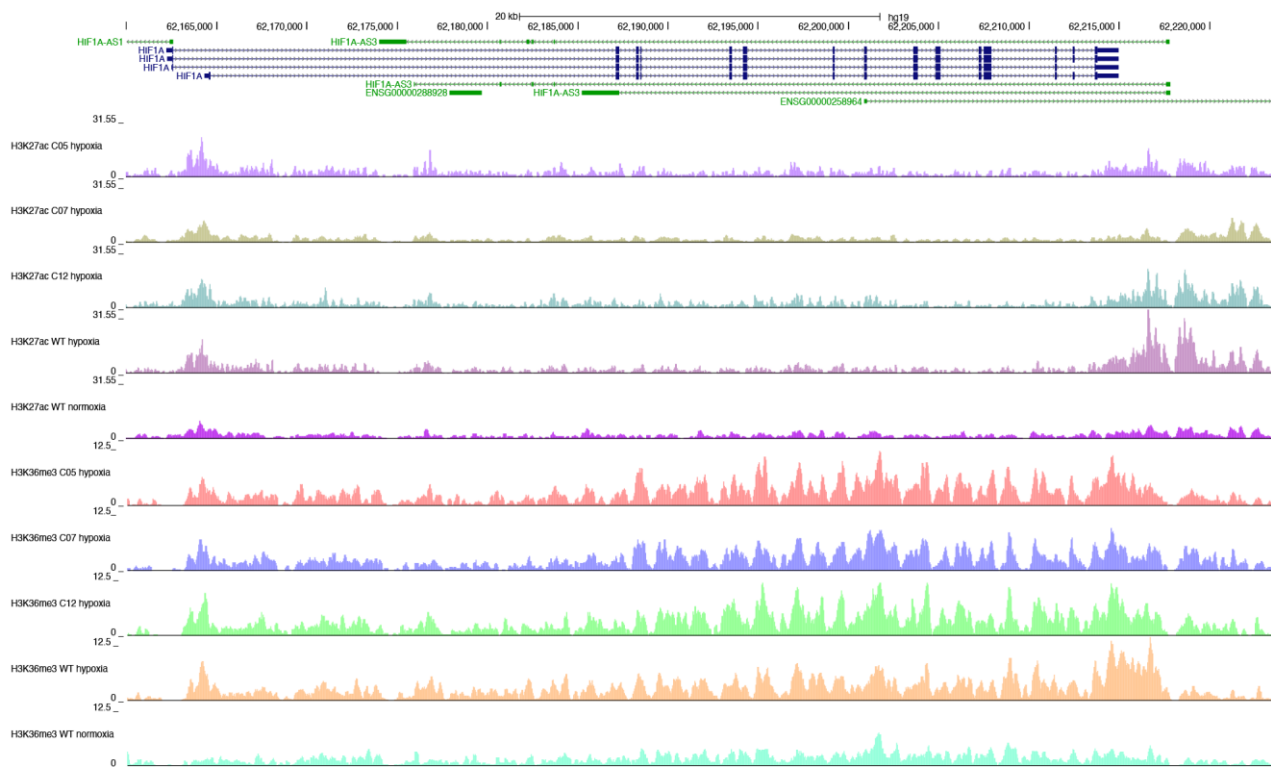

**Figure S9:** UCSC browser track showing normalised H3K36me3 and H3K27ac ChIPseq reads from the *HIF1A* locus from wildtype and *HIF1A-AS* knockout cell lines (C05, C07, C12) in hypoxia. Levels of H3K36me3 and H3K27ac in wildtype cells are shown for reference.

| <b>Target</b>                         | <b>ID or sequence</b>                                                                        |
|---------------------------------------|----------------------------------------------------------------------------------------------|
| <i>Control scrambled ASO</i>          | AACACGTCTATACGC, LNA longRNA GapmeR <i>in vivo</i> ready, Exiqon 300612-00                   |
| <i>HIF-1-AS ASO1</i>                  | GTGTAGATGCTCTTTG, LNA longRNA GapmeR <i>in vivo</i> ready, Exiqon                            |
| <i>HIF-1-AS ASO2</i>                  | GAAGTAGGTCATAGG, LNA longRNA GapmeR <i>in vivo</i> ready, Exiqon                             |
| <i>HIF-1-AS ASO3</i>                  | GTTAGCATGAGAAAC, LNA longRNA GapmeR <i>in vivo</i> ready, Exiqon                             |
| <i>HIF1A-ASgRNA</i>                   | Fwd: CACCGTACACGAAAGTCGCCTTGCG,<br>Rev: AAACCGCAAGGCGACTTTTCGTGTAC                           |
| <i>HIF1A-AS</i>                       | Fwd: TGACGGTGCATAAAATTGGGAAG,<br>Rev: TGAAAGCATTGAGAAGGGAAAGC                                |
| <i>HIF1A Exon1-Exon2</i>              | Fwd: TTTCCTTCTCTTCCGCGT<br>Rev: CGAGACTTTTCTTTTCGACGTTC<br>Probe: CCGCCCGCCGTGAAGACATCGC     |
| <i>RPLP0</i>                          | Fwd: GGAGACGGATTACACCTTCCC<br>Rev: CAGCCACAAAGGCAGATGG                                       |
| <i>ATP5F1</i>                         | Fw:GCCCTGACAGATTCTCCTATCG,<br>Rev:GAAAGTCCTTGTGCCTGC                                         |
| <i>HIF1A Exon 2 tagged SPRT</i>       | GGCAGTATCGTGAATTCGATGCCGAGACTTTTCTTTTCGACGTTC                                                |
| <i>Tag Primer Rev</i>                 | aataaatcataaGGCAGTATCGTGAATTCGATGC*                                                          |
| <i>HIF1A Intron1-Exon2 Tagged Fwd</i> | aataaatcataaTGGCATCTTCTAATCCTTCTGTG*                                                         |
| <i>HIF1A-AS crRNA 5'</i>              | CUUCUGGGACUUGUCAAGUGUUUUAGAGCUAUGCU                                                          |
| <i>HIF1A-AS crRNA 3'</i>              | UUCAAUAGUACACGGAGAUCGUUUUAGAGCUAUGCU                                                         |
| <i>HIF1aAS TSS CRISPR screen</i>      | Fwd: TTTCAGTGCCATTTAGTGGGTTT<br>Rev: CAGCTTGTTTCTGTACGCCTATG                                 |
| <i>ChIP-seq adapters</i>              | Bioo Scientific NEXTflex 6 DNA Barcoded Illumina Adapters #514101                            |
| <i>oNTI200-Index**</i>                | CAAGCAGAAGACGGCATAACGAGATXXXXXXGTGACTGGAGTTCAGACGTGTGCTCTTCCGATCT                            |
| <i>oNTI201-Index</i>                  | AATGATACGGCGACCACCGACAGGTTTCTACAGTCCGACG                                                     |
| <i>oNTI223-Index</i>                  | /5Phos/GATCGTCGGACTGTAGAACTCTGAAC/iSp18/TCAGACGTGTGCTCTTCCGATCTTTTTTT<br>TTTTTTTTTTTTTTVN    |
| <i>Illumina P5</i>                    | AATGATACGGCGACCACCGA                                                                         |
| <i>Illumina P7</i>                    | CAAGCAGAAGACGGCATAACGA                                                                       |
|                                       | *lowercase nucleotides denotes noncomplementary 5' overhangs<br>** <u>XXXXXX</u> 6nt barcode |

**Table S1:** Oligonucleotides used in this study
